# Supplementary material for: TiO2-Supported Pd as an Efficient and Stable Catalyst for the Mild Hydrotreatment of Tar-Type Compounds
Source: MDPI journal article supplement (doi:10.3390/nano11092380), 2021-09-13
Supplement: s1 [file s1]

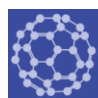

## Supplementary Materials

TiO<sub>2</sub>-Supported Pd as an Efficient and Stable Catalyst for the Mild Hydrotreatment of Tar-Type CompoundsZaher Raad <sup>1,2</sup>, Joumana Toufaily <sup>2</sup>, Tayssir Hamieh <sup>2</sup> and Marcelo E. Domine <sup>1,\*</sup><sup>1</sup> Instituto de Tecnología Química (UPV-CSIC), Universitat Politècnica de València, Consejo Superior de Investigaciones Científicas, Avda. de los Naranjos s/n, 46022 Valencia, Spain; zaraa@upvnet.upv.es<sup>2</sup> Laboratoire de Matériaux, Catalyse, Environnement et Méthodes Analytiques (MCEMA-CHAMSI), EDST, Université Libanaise, Campus Hariri, Hadath, 1003 Beyrouth, Lebanon; joumana.toufaily@ul.edu.lb (J.T.); tayssir.hamieh@ul.edu.lb (T.H.)

\* Correspondence: mdomine@itq.upv.es

## Preliminary catalytic screening:

**Table S1.** Catalytic activity (Conversion and selectivity to the different groups of products) of carbon-supported Pd, Pt and Ru commercial catalysts (comparison at 50–60% conversion).<sup>a</sup>

| Catalyst | Conv.<br>(mol%) | TON <sup>b</sup> | Product selectivity (mol%) <sup>c</sup> |          |         |     |        |        |        |                   |
|----------|-----------------|------------------|-----------------------------------------|----------|---------|-----|--------|--------|--------|-------------------|
|          |                 |                  | MonoAr                                  | Tetralin | Decalin | Ace | HAce-1 | HPhe-1 | HPhe-2 | HAce-2<br>/HPhe-3 |
| 5wt%Pd/C | 71              | 21               | 2                                       | 32       | 0       | 4   | 42     | 18     | 2      | 0                 |
| 5wt%Pt/C | 55              | 30               | 2                                       | 29       | 0       | 34  | 13     | 21     | 1      | 0                 |
| 5wt%Ru/C | 52              | 15               | 2                                       | 32       | 0       | 35  | 14     | 16     | 1      | 0                 |

<sup>a</sup> Reaction conditions: 0.5 g of tars-type compounds, 4 g of n-hexadecane, 0.2 g of catalyst, at 250 °C and 30 bar of H<sub>2</sub> during 7 h. <sup>b</sup>TON = mols of products / mols of metal. <sup>c</sup> Liquid phase composition; Selectivity = mol of product (t) × 100 / total mol of identified products (t).

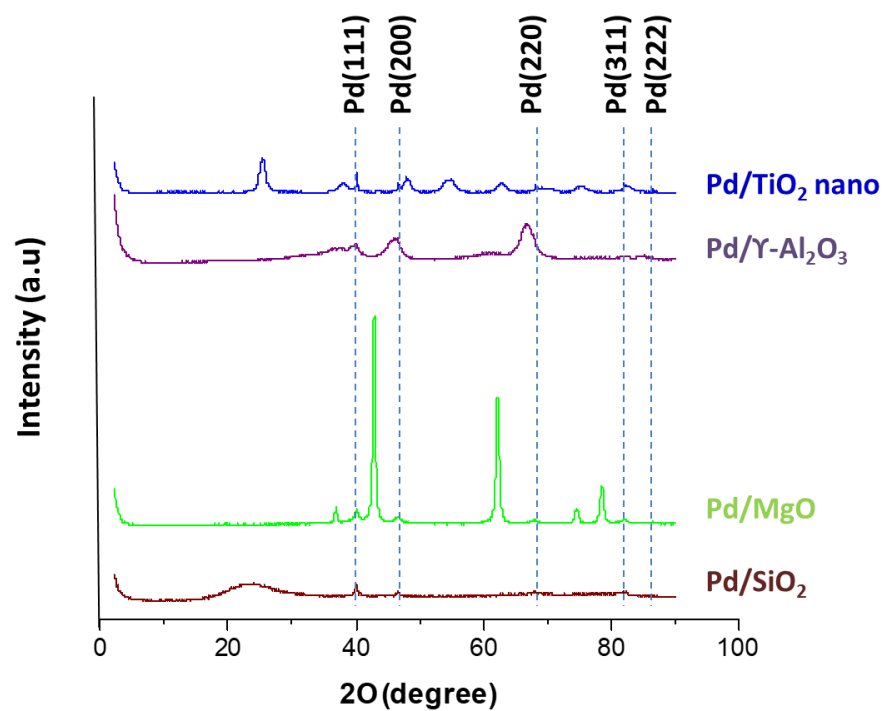

Figure S1. XRD patterns for different metal oxides-supported Pd catalysts.

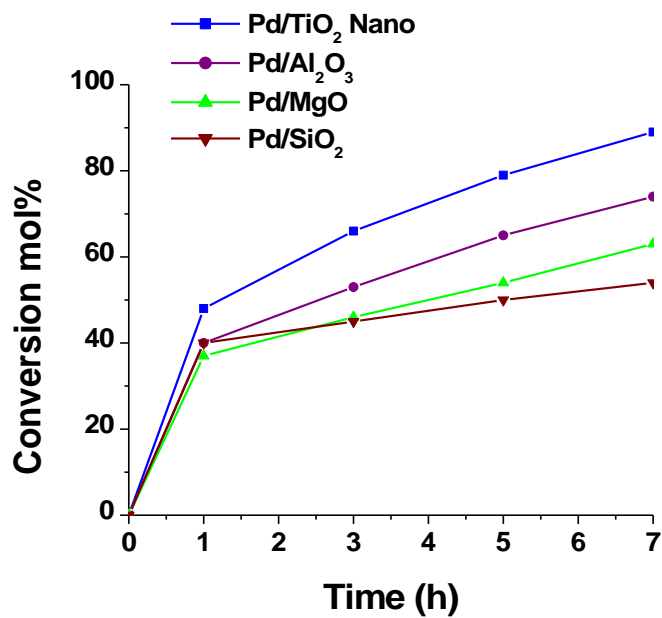

Figure S2. Conversion vs time for different metal oxides-supported Pd catalysts. Reaction conditions: 0.5 g of tar-type compounds, 4 g of n-hexadecane at 250 °C and 30 bar of H<sub>2</sub> during 7 h.

**Effect of Pd content in Pd/TiO<sub>2</sub> (Nano) catalysts:**

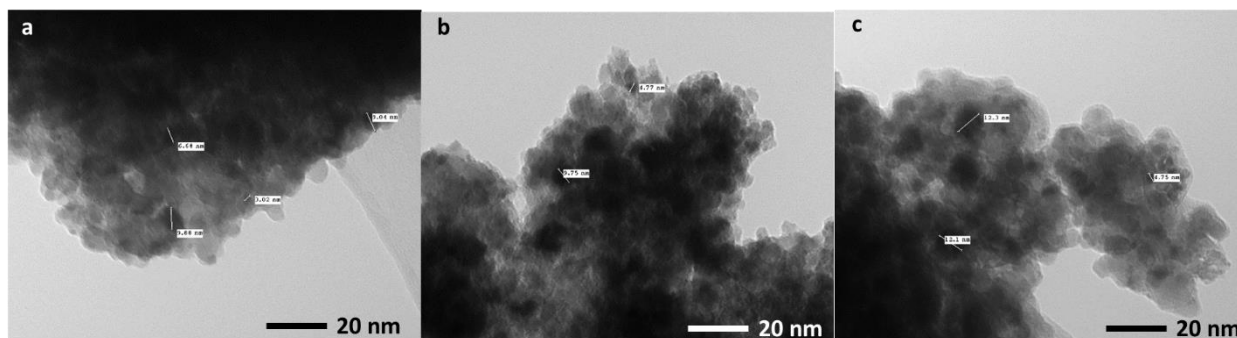

**Figure S3.** TEM images of (a) 0.8wt%Pd/TiO<sub>2</sub> (4–7 nm), (b) 1.3wt%Pd/TiO<sub>2</sub> (5–9 nm), and (c) 2.2wt% Pd/TiO<sub>2</sub> (6–12 nm).

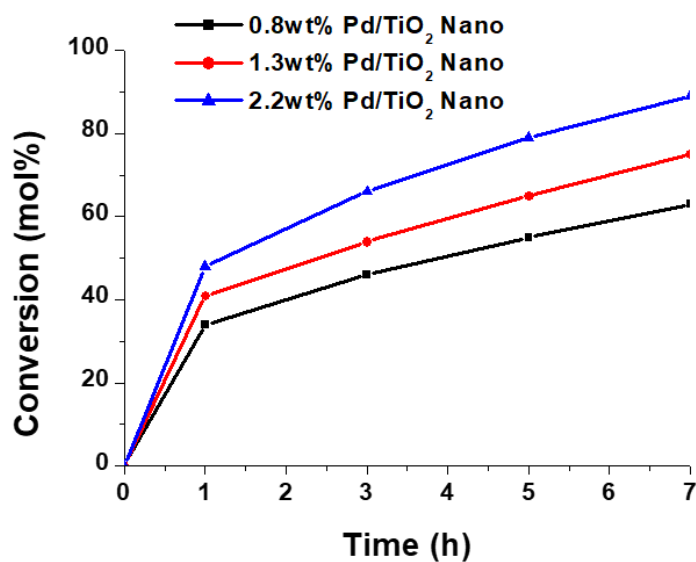

**Figure S4.** Conversion vs time for Pd/TiO<sub>2</sub> Nano catalysts with different Pd loadings. Reaction conditions: 0.5 g of tars-type compounds, 4 g of n-hexadecane, 0.2 g of catalyst, at 250 °C and 30 bar of H<sub>2</sub> during 7 h.

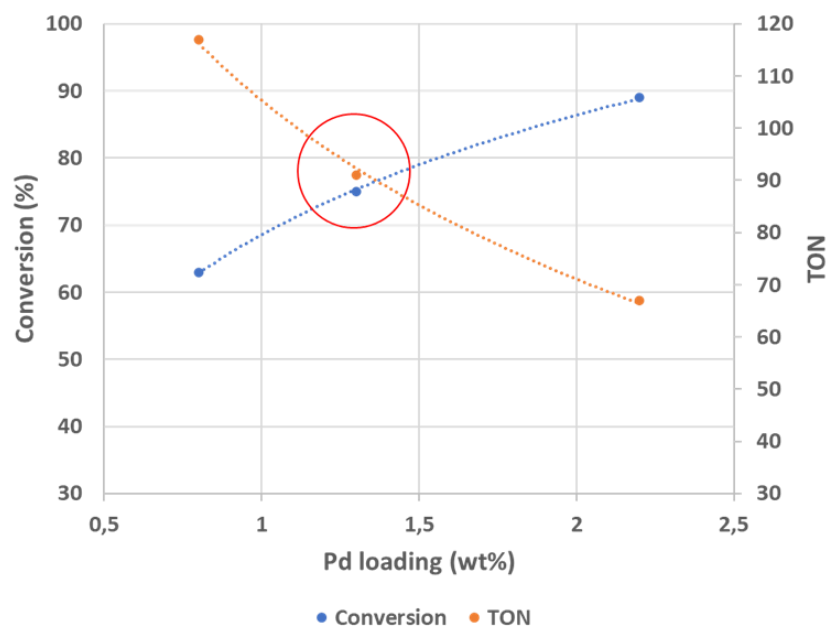

**Figure S5.** Conversion and TON (mols prod. / mols of Pd in solid) vs Pd loading for Pd/TiO<sub>2</sub> nano catalysts. Reaction conditions: 0.5 g of tars-type compounds, 4 g of n-hexadecane, 0.2 g of catalyst, at 250 °C and 30 bar of H<sub>2</sub> during 7 h.

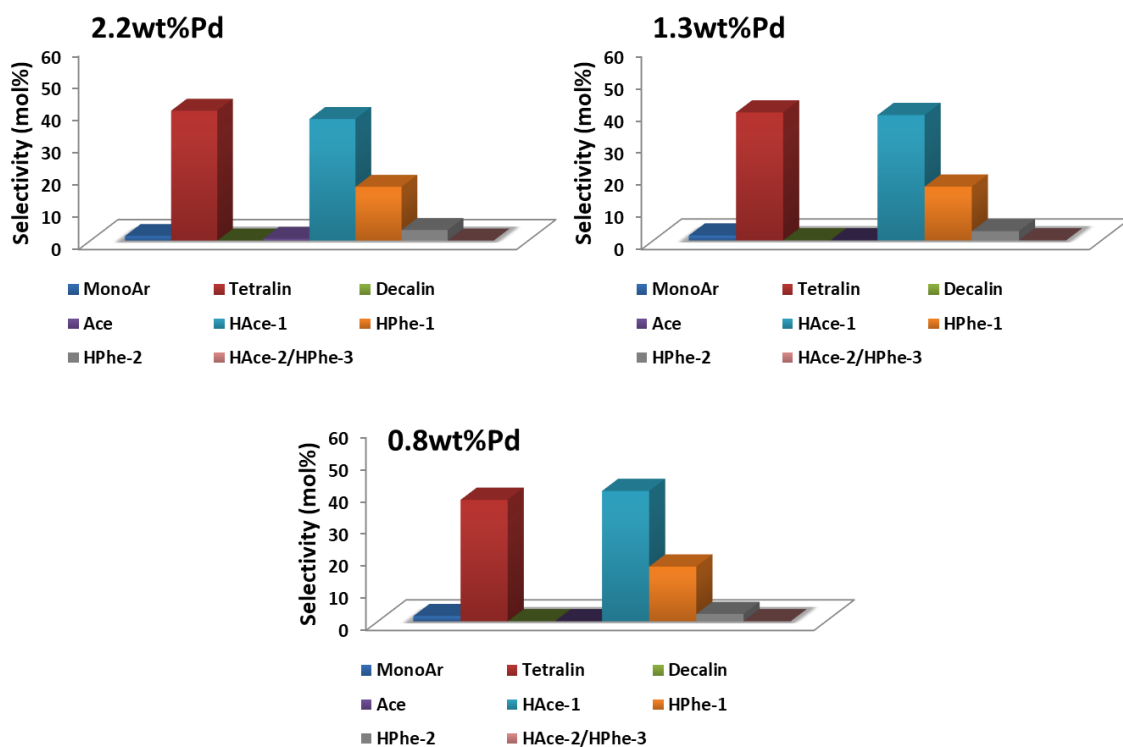

**Figure S6.** Selectivity to the different groups of products for Pd/TiO<sub>2</sub> Nano catalysts compared in the range 63-65% of conversion. Reaction conditions: 0.5 g of tars-type compounds, 4 g of n-hexadecane, 0.2 g of catalyst, at 250 °C and 30 bar of H<sub>2</sub> during 7 h.

**Table S2.** Pd/TiO<sub>2</sub> Nano catalysts prepared by using different Pd precursors and their catalytic results in tars mild hydrotreatment.<sup>a</sup>

| <b>Pd Precursor</b>                                                  | <b>Pd (wt%)<sup>b</sup></b> | <b>Conversion (mol%)</b> | <b>TON<sup>c</sup></b> |
|----------------------------------------------------------------------|-----------------------------|--------------------------|------------------------|
| Pd(NH <sub>3</sub> ) <sub>4</sub> .Cl <sub>2</sub> .H <sub>2</sub> O | 1.3                         | 75                       | 91                     |
| Pd(NO <sub>3</sub> ) <sub>2</sub> .2H <sub>2</sub> O                 | 1.3                         | 79                       | 90                     |
| Pd(NO <sub>3</sub> ) <sub>2</sub> .4NH <sub>3</sub>                  | 0.8                         | 68                       | 127                    |
| Pd(NH <sub>3</sub> ) <sub>4</sub> .Cl <sub>2</sub> .H <sub>2</sub> O | 0.8                         | 63                       | 117                    |

<sup>a</sup> Reactions conditions: 0.5 g of tars -type compounds, 4 g of n-hexadecane, at 250 °C, 30 bar of H<sub>2</sub>, 0.2 g catalyst during 7 h. <sup>b</sup>

Measured by ICP; <sup>c</sup> TON = mols of products / mols of metal in solid.

### Effect of TiO<sub>2</sub> crystalline phase used as support

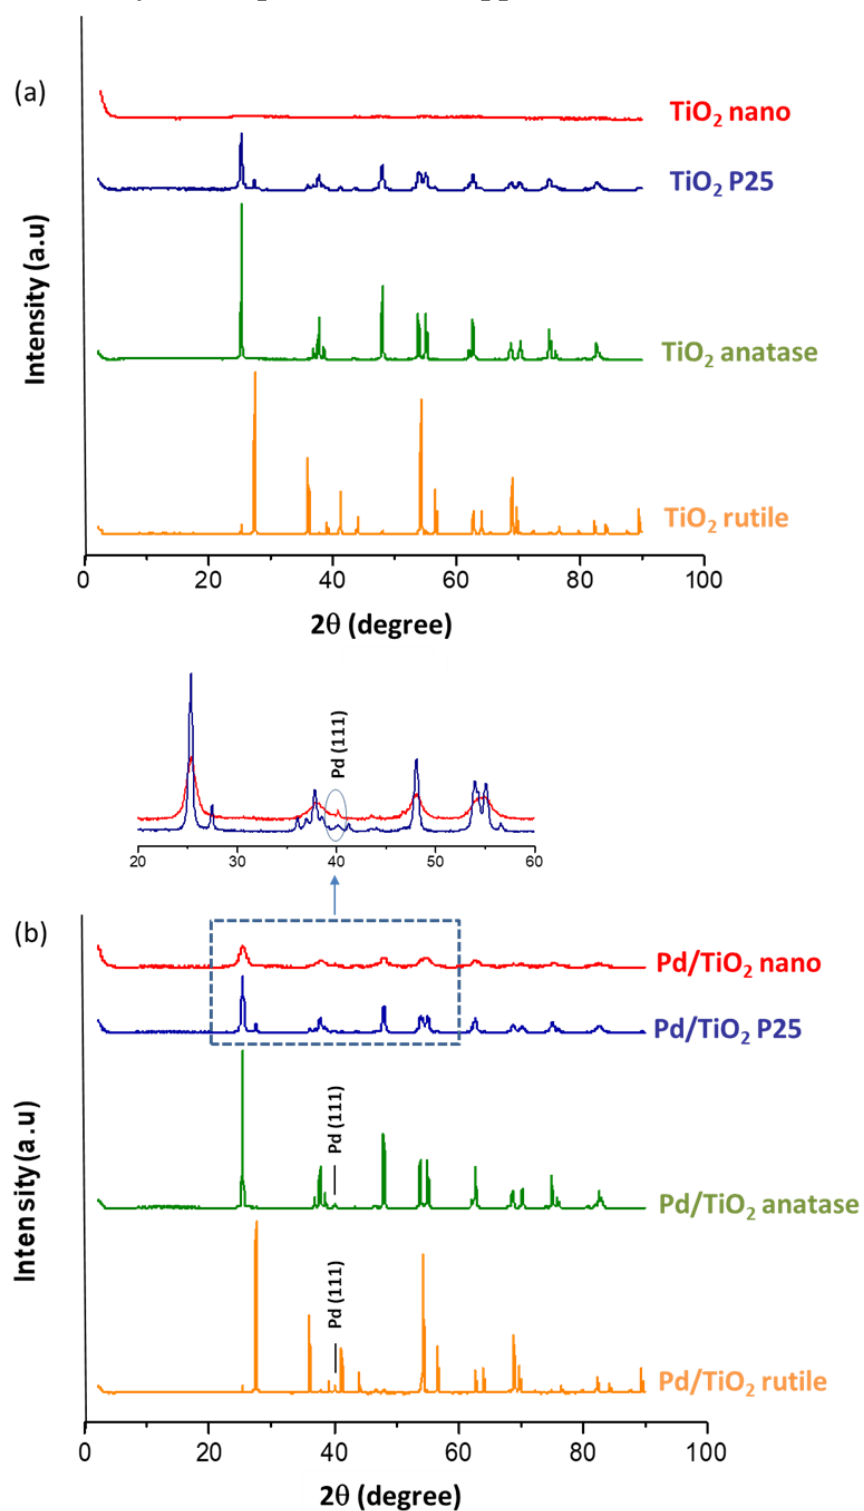

**Figure S7.** XRD patterns of different (a) pure TiO<sub>2</sub> supports and (b) TiO<sub>2</sub>-supported Pd catalysts (Inset showing a zoom of 20-60° 2θ region for Pd/TiO<sub>2</sub> nano and Pd/TiO<sub>2</sub> P25).

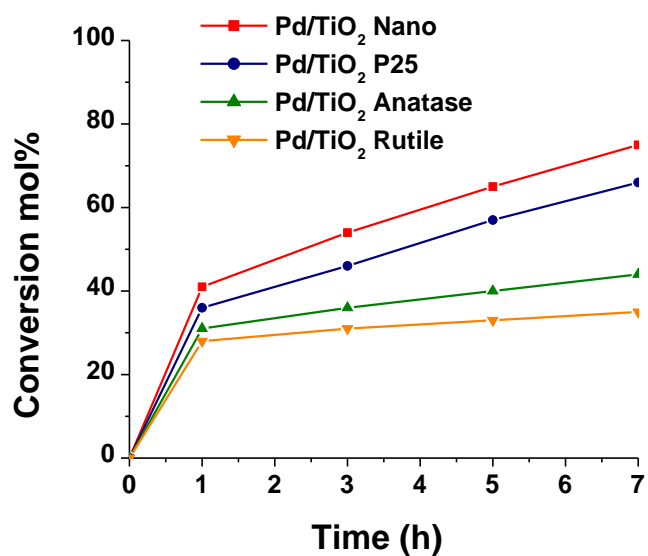

**Figure S8.** Conversion vs time for different TiO<sub>2</sub>-supported Pd catalysts in tars mild hydrotreatment. Reaction conditions: 0.5 g of tars-type compounds, 4 g of n-hexadecane, at 250 °C and 30 bar of H<sub>2</sub> during 7 h.

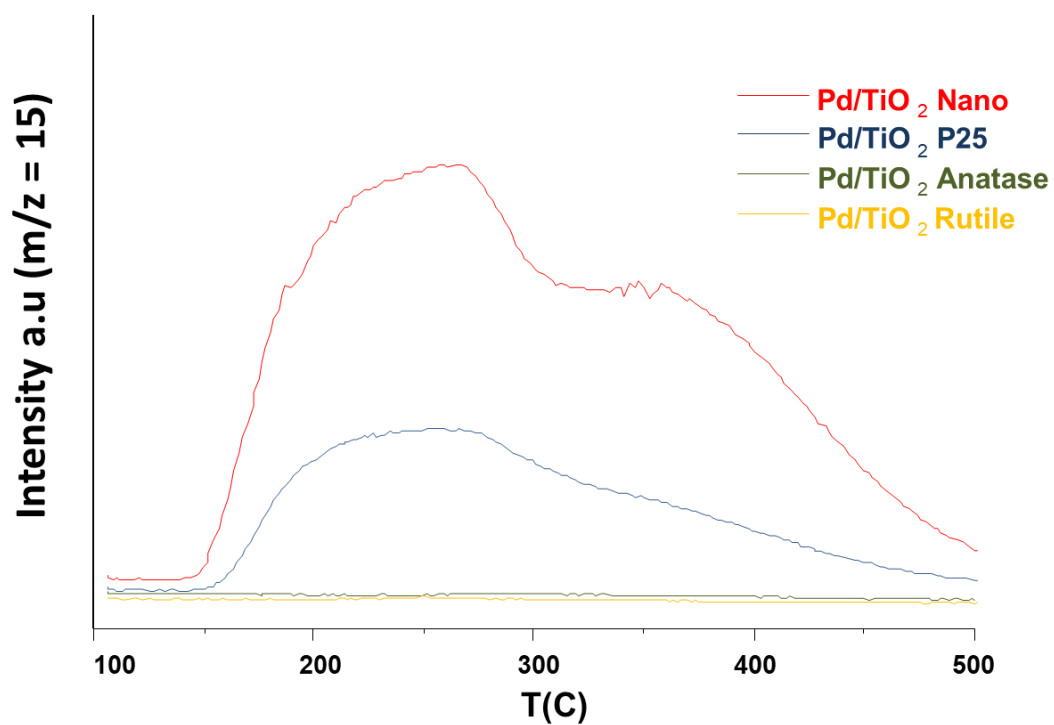

**Figure S9.** NH<sub>3</sub>-TPD profiles for different TiO<sub>2</sub>-supported Pd catalysts.

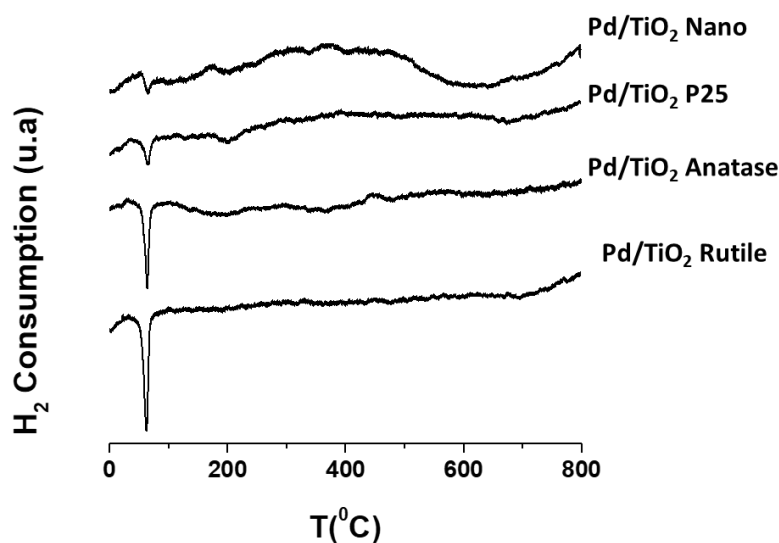

Figure S10. H<sub>2</sub>-TPR profiles for different TiO<sub>2</sub>-supported Pd catalysts.

### Effect of reaction conditions for Pd/TiO<sub>2</sub> Nano catalyst

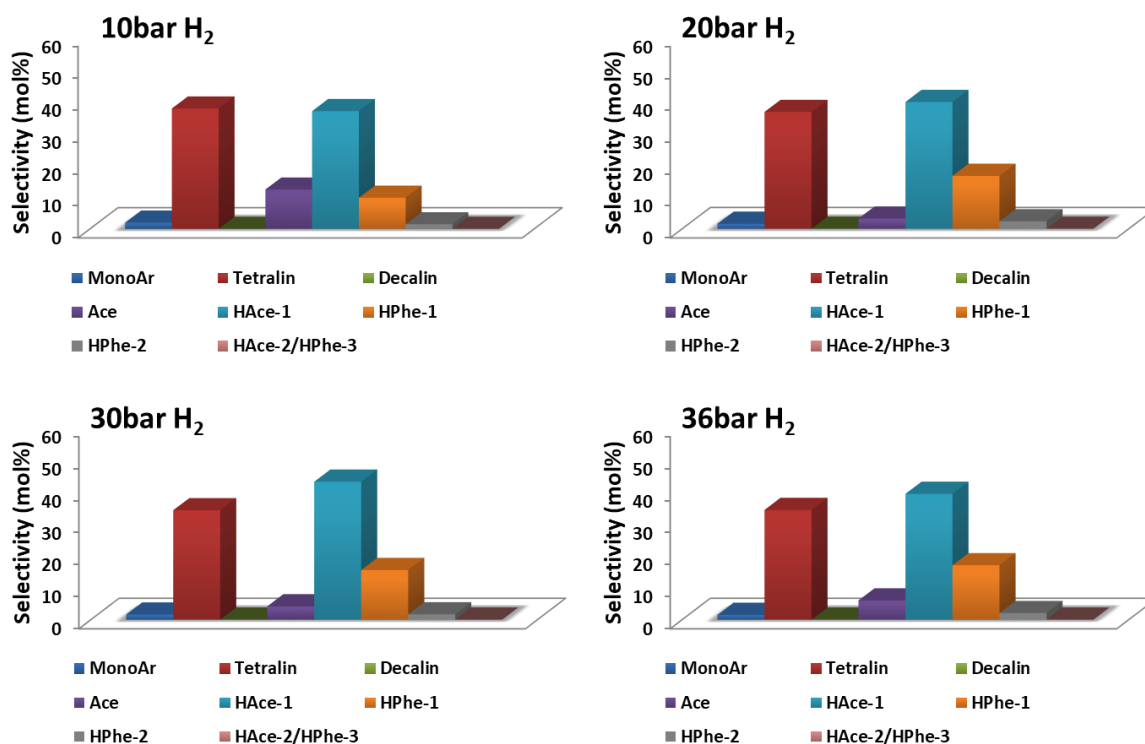

Figure S11. Selectivity to the different groups of products (compared at ≈53% conversion) for 1.3wt%Pd/TiO<sub>2</sub> Nano catalyst by using different H<sub>2</sub> pressures. Reaction conditions: 0.5 g of tars-type compounds, 4 g of n-hexadecane, 0.2 g of catalyst, at 275 °C during 7 h.



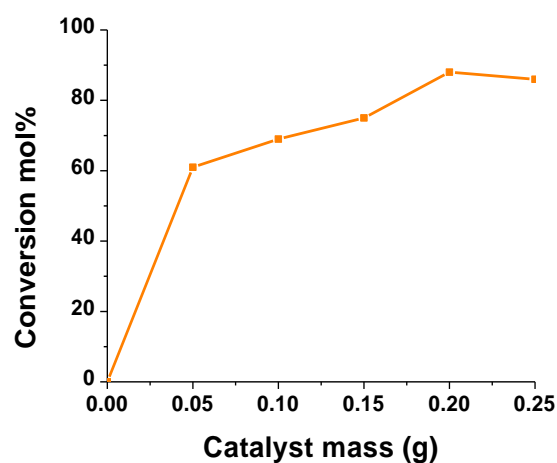

**Figure 12.** Catalyst loading optimization in tars mild hydrotreatment over 1.3wt%Pd/TiO<sub>2</sub> Nano. Reaction conditions: 0.5 g of tars-type compounds, 4 g of n-hexadecane, at 275 °C and 30 bar of H<sub>2</sub> during 7 h.

## Reusability tests

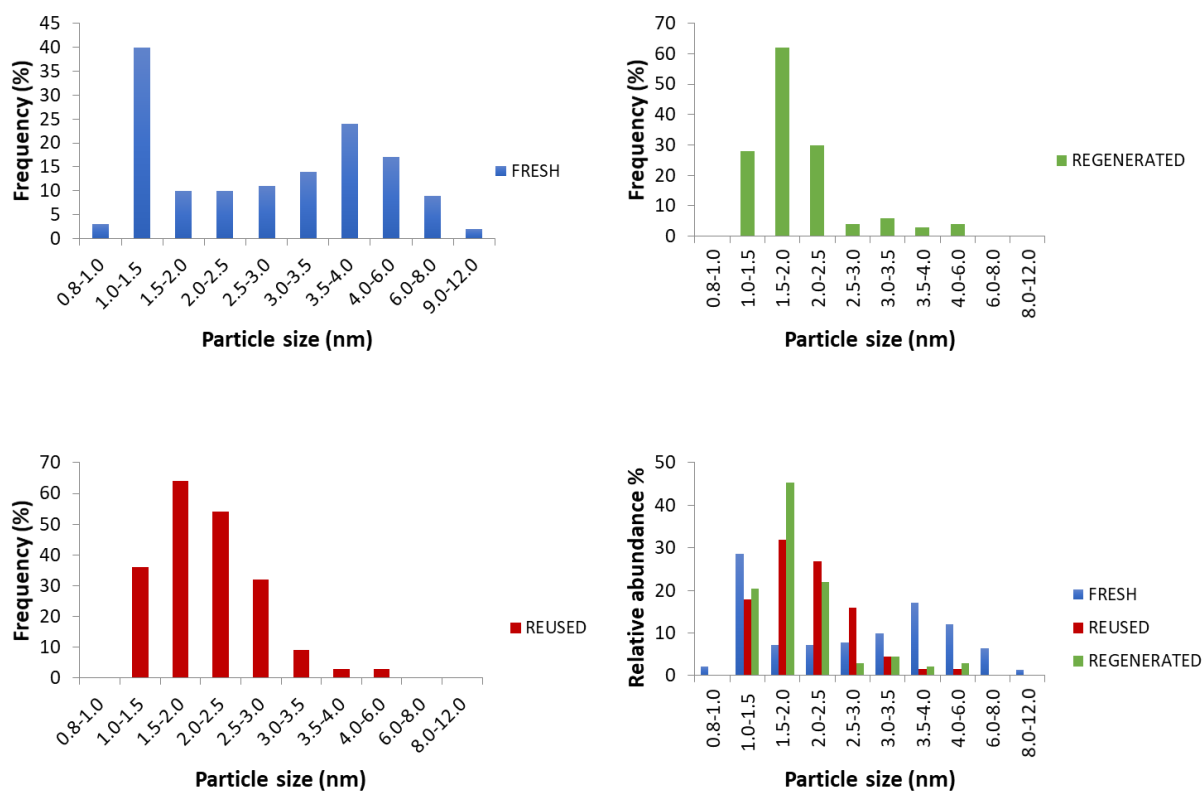

**Figure S13.** Pd particle size distribution of fresh, reused and regenerated samples of Pd/TiO<sub>2</sub> Nano catalyst.

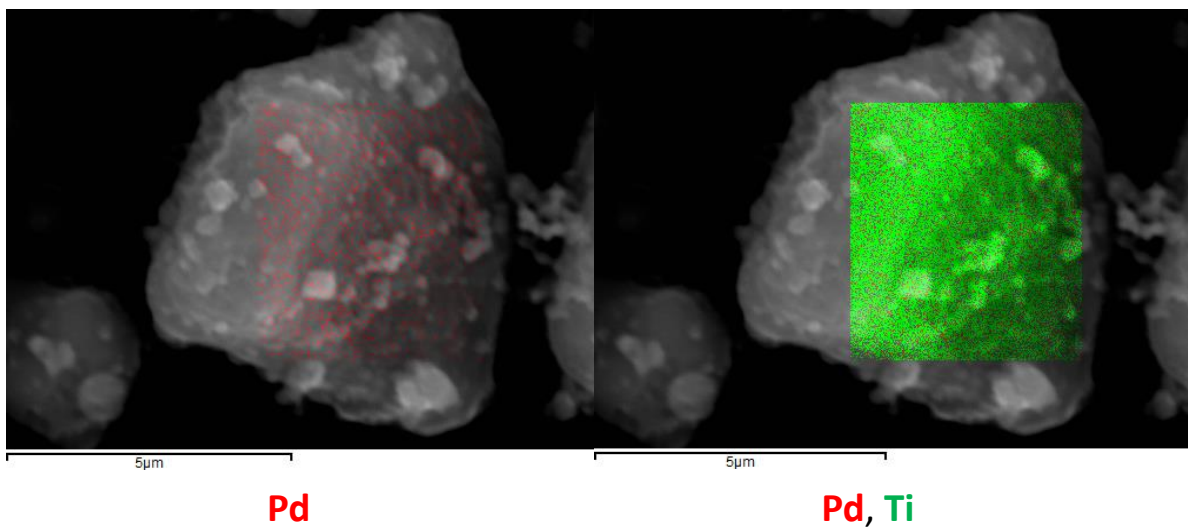

Figure S14. SEM-EDX for the fresh sample of Pd/TiO<sub>2</sub> Nano catalyst.

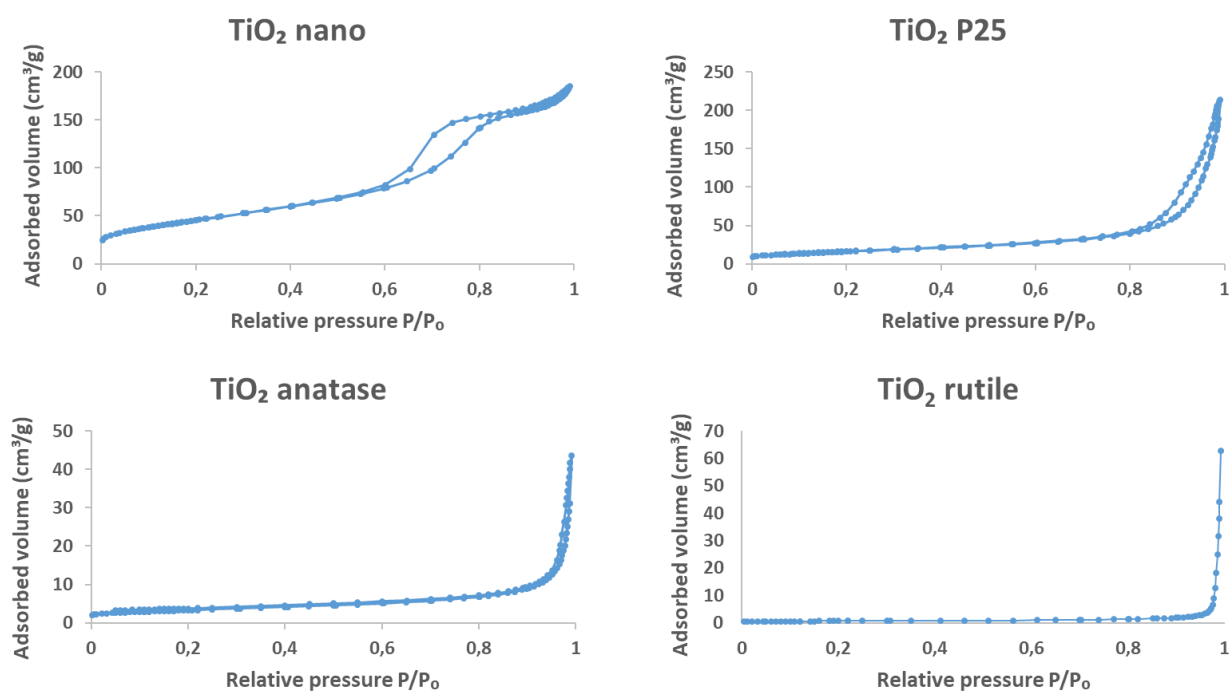

Figure S15. Nitrogen adsorption-desorption isotherms for different TiO<sub>2</sub> materials.

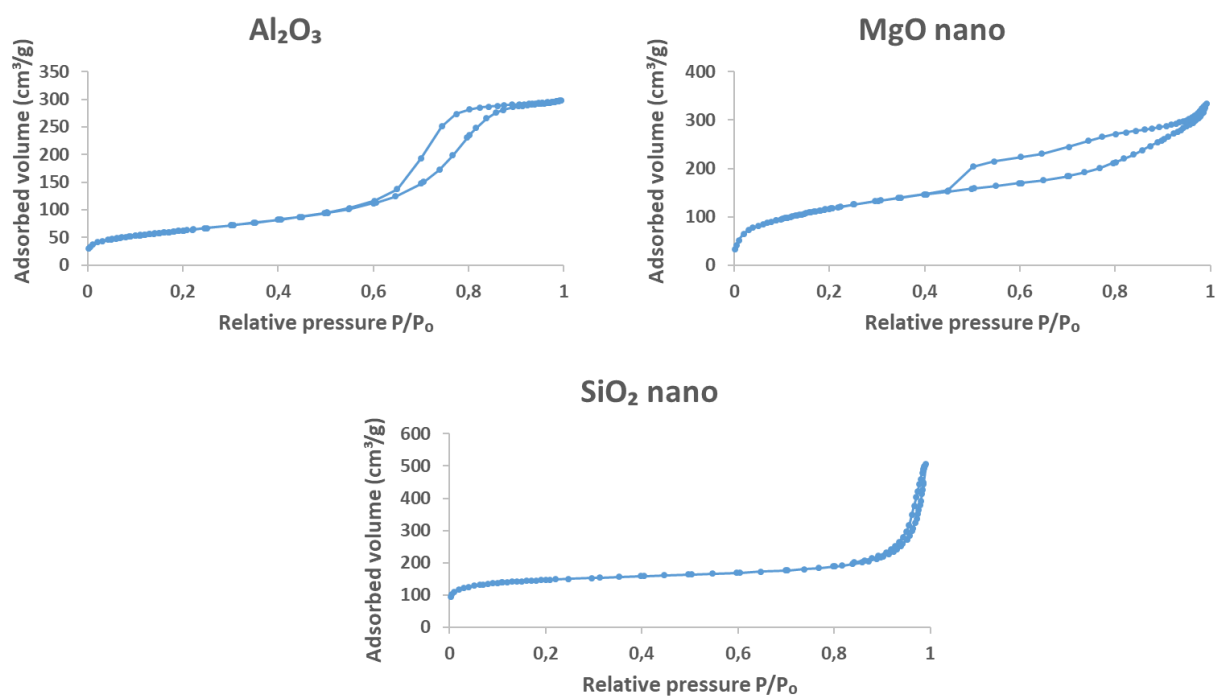

**Figure S16.** Nitrogen adsorption-desorption isotherms for different metal oxides materials.
